# Supplementary material
Source: MDPI journal article supplement (https://www.mdpi.com/2073-4352/13/10/1512)
Supplement: s1 [file s1]

## Supplementary Material

### A Comparison Study of Roseolumiflavin Solvates: Structural and Energetic Perspective on Their Stability

Takin Haj Hassani Sohi, Felix Maass, Constantin Czekelius, Vera Vasylyeva\*

#### IR analysis

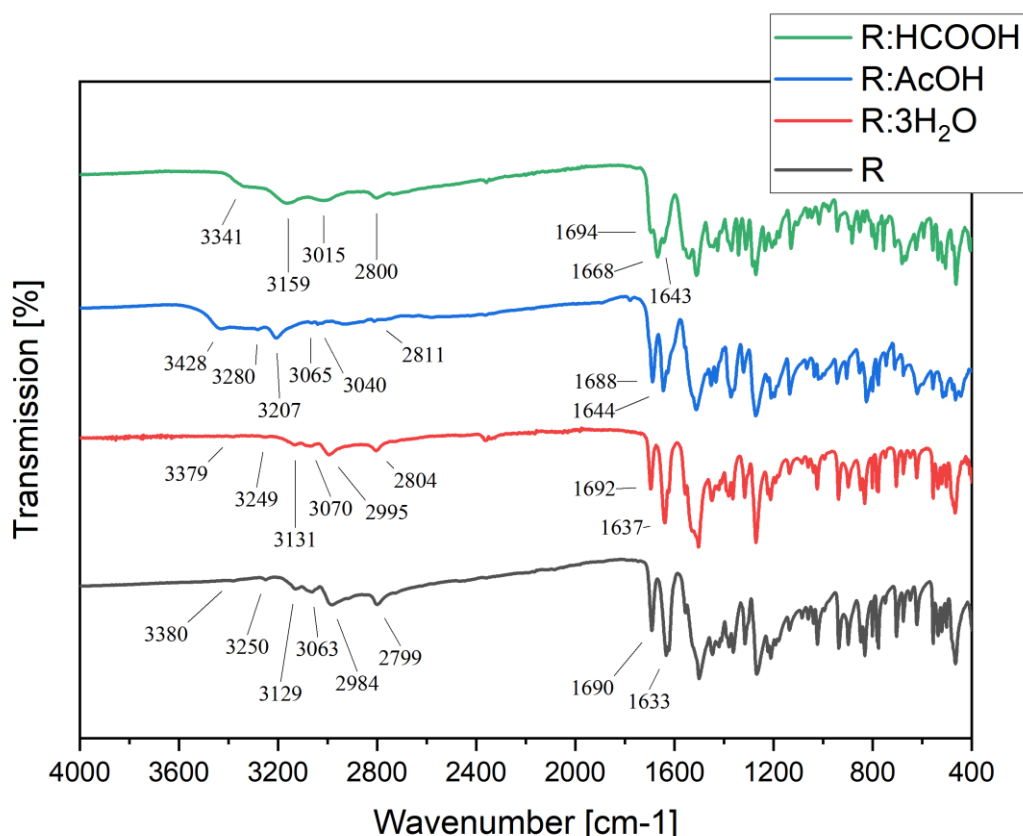

Figure S1: Comparison of IR spectra of **R:HCOOH**, **R:AcOH**, **R:3H<sub>2</sub>O** with **R**. Characteristic bands are highlighted.

In comparison to **R**, for **R:AcOH** a new broad band at 3428 cm<sup>-1</sup> appears which likely originates from O-H stretching vibration and overlaps the high N-H stretching band of pure **R** at 3380 cm<sup>-1</sup>. Likewise, the band at 3207 cm<sup>-1</sup> may be caused by intermolecular bonded O-H group. The amide C=O vibration at 1644 cm<sup>-1</sup> is blue-shifted by +11 cm<sup>-1</sup> while the band at 1689 cm<sup>-1</sup> remains unmodified. Strong blue-shifts for the C-H vibrations at 2811 cm<sup>-1</sup> by +12 cm<sup>-1</sup> and the NC-H vibration at *ca.* 3030 cm<sup>-1</sup> by *ca.* +36 cm<sup>-1</sup> evince noticeable effects on the methyl group bonds.

**R:3H<sub>2</sub>O** contains slightly blue-shifted C=O vibrational bands by 4 to 5 cm<sup>-1</sup>, the N-H stretching bands are unaltered. The NC-H hydrogen stretching band at 2804 cm<sup>-1</sup> is blue-shifted by +5 cm<sup>-1</sup>, so are the bands for C-H vibrations at 3070 cm<sup>-1</sup> by +7 cm<sup>-1</sup> and 2995 cm<sup>-1</sup> by +11 cm<sup>-1</sup>, indicating substantial increase in bond strength in the new packing environment.

The spectrum for **R:HCOOH** displays a broad band at  $3341\text{ cm}^{-1}$  representing the O-H vibration band of the solvent molecule. Here, the N-H stretching vibrational mode of the imide group at  $3159\text{ cm}^{-1}$  is overlapped by it. The broad band at  $3015\text{ cm}^{-1}$  is likely caused by C-H stretching vibrations of the **R** methyl groups, blue-shifted by  $+26\text{ cm}^{-1}$ . Also, the C=O stretching bands of the imide group at  $1694\text{ cm}^{-1}$  and  $1643\text{ cm}^{-1}$  are blue-shifted by  $+5\text{ cm}^{-1}$  and  $+10\text{ cm}^{-1}$ , respectively. At  $1668\text{ cm}^{-1}$  a new band arises, which is to be identified as the C=O stretching mode of the acid unit.

#### Simulated PXRD patterns

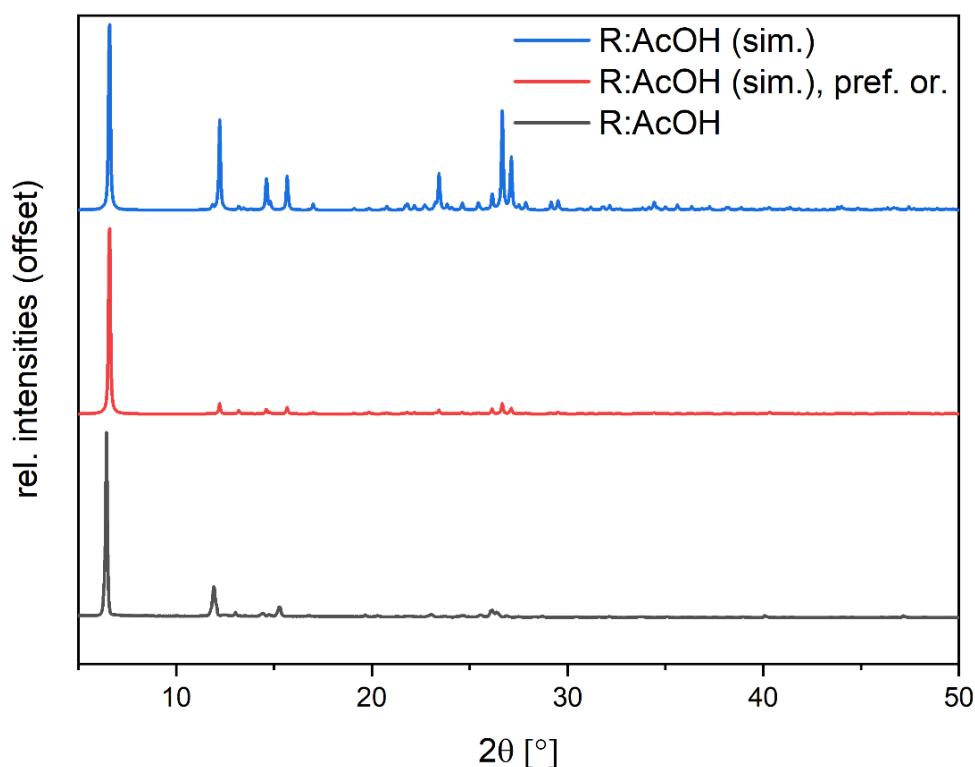

Figure S2: Experimental powder pattern of **R:AcOH** compared to simulated patterns of **R:AcOH** and adjusted simulated pattern for consideration of preferred orientation from single crystal data.

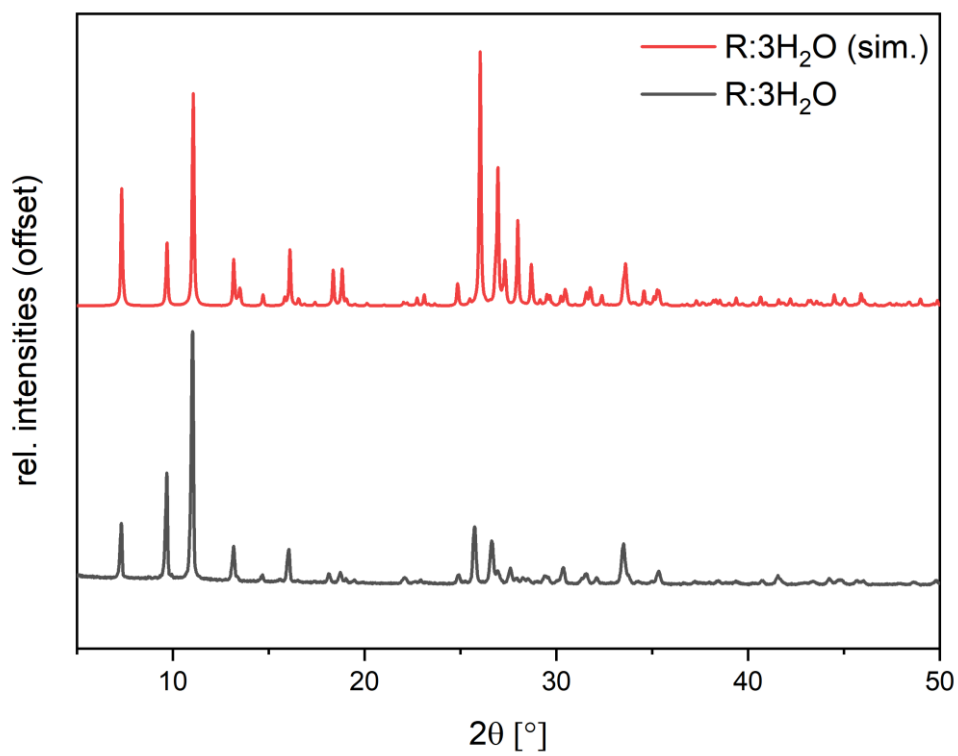

Figure S3: Experimental powder pattern of **R:3H<sub>2</sub>O** compared to simulated pattern from single crystal data.

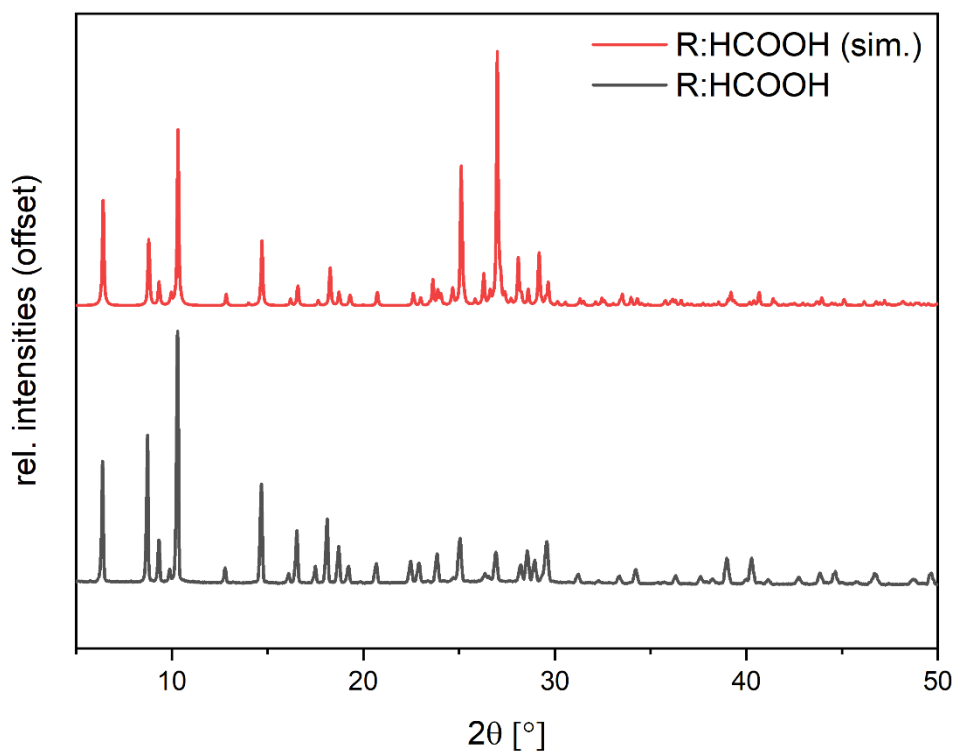

Figure S4: Experimental powder pattern of **R:HCOOH** compared to simulated pattern from single crystal data.

Crystal structures of **R:AcOH**, **R:AcOH:H<sub>2</sub>O**, **R:3H<sub>2</sub>O** and **R:HCOOH**

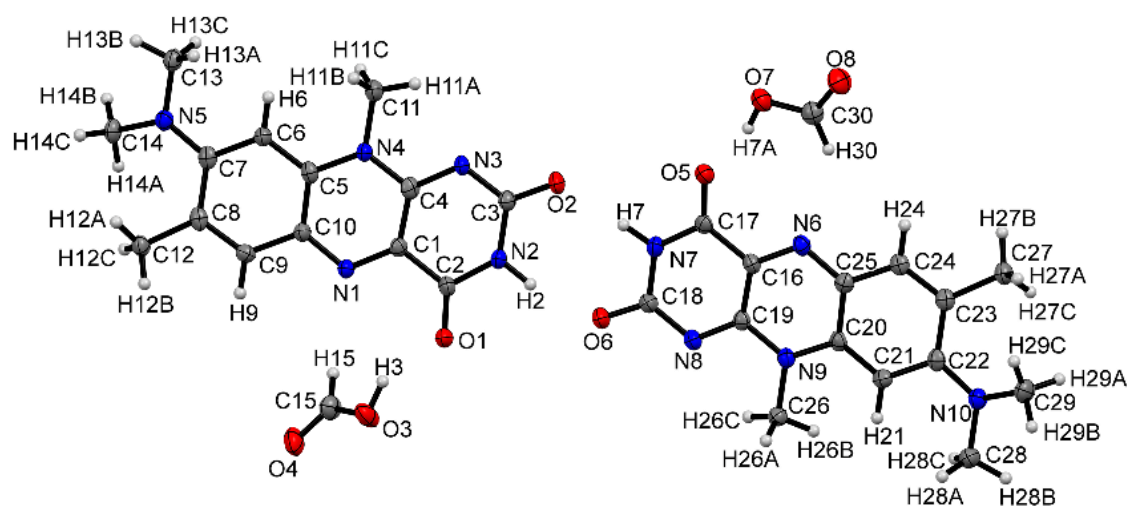

Figure S5: Asymmetric unit of **R:HCOOH**. View along the crystallographic *a*-axis.

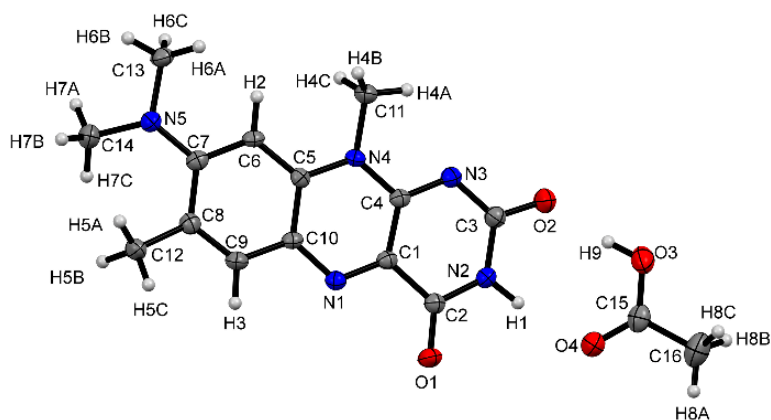

Figure S6: Asymmetric unit of **R:AcOH**. View along the crystallographic *a*-axis.

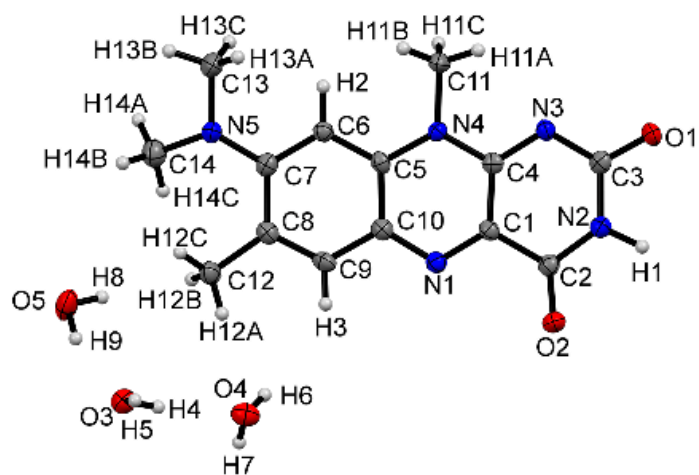

Figure S7: Asymmetric unit of **R:3H<sub>2</sub>O**. View along the crystallographic *a*-axis.

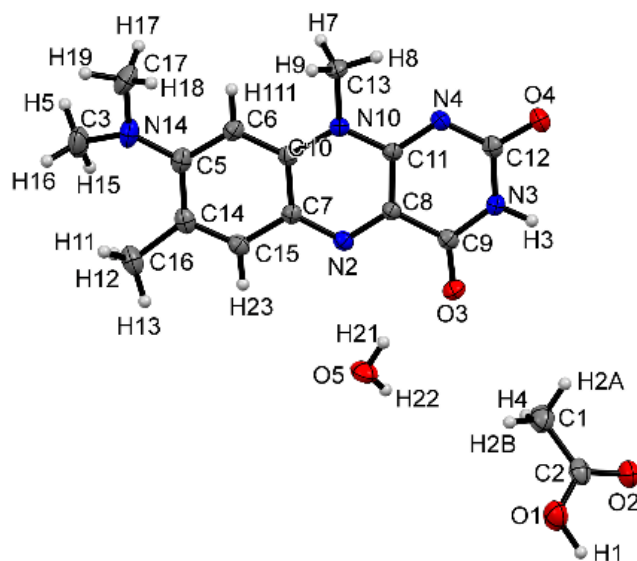

Figure S8: Asymmetric unit of **R:AcOH:H<sub>2</sub>O**. View along the crystallographic *a*-axis.

## Overview of the hydrogen bonds

| D-H...A              | D-H [Å] | H...A [Å] | D...A [Å] | D-H...A [°] |
|----------------------|---------|-----------|-----------|-------------|
| N1-H1...O4           | 0.94(3) | 1.95(3)   | 2.879(2)  | 170(3)      |
| O3-H9...O2           | 0.88(4) | 1.72(4)   | 2.596(2)  | 173(4)      |
| C6-H2...O1           | 0.95(2) | 2.53(2)   | 3.472(3)  | 172(2)      |
| (intra) C11-H4A...N3 | 0.96(2) | 2.20(2)   | 2.725(3)  | 112.8(18)   |
| C16-H8B...O2         | 0.95(3) | 2.47(3)   | 3.420(3)  | 173(3)      |

Table S1: Geometries of hydrogen bonded interactions of **R:AcOH**.

| D-H...A               | D-H [Å] | H...A [Å] | D...A [Å] | D-H...A [°] | A-H...A [°] | Sum(XY,YZ) |
|-----------------------|---------|-----------|-----------|-------------|-------------|------------|
| N2-H1...O5            | 0.99(6) | 1.78(6)   | 2.774(5)  | 174(6)      |             |            |
| O3-H4...O4            | 0.83(4) | 2.06(4)   | 2.887(4)  | 176(4)      |             |            |
| O3-H5...O4            | 0.93(5) | 1.91(5)   | 2.833(5)  | 172(4)      |             |            |
| O4-H6...N3            | 0.77(7) | 2.29(7)   | 2.981(5)  | 151(7)      |             |            |
| O4-H7...O1            | 0.79(5) | 2.00(5)   | 2.759(4)  | 160(5)      |             |            |
| O5-H8...O1            | 0.89(6) | 1.87(6)   | 2.752(4)  | 168(5)      |             |            |
| O5-H9...O3            | 0.89(5) | 1.95(5)   | 2.805(5)  | 161(4)      |             |            |
| C11-H11A...N3         | 0.98    | 2.52      | 3.429(6)  | 154         |             |            |
| (intra) C11-H11A...N3 | 0.98    | 2.33      | 2.698(5)  | 101'        | 99'         | 354        |

Table S2: Geometries of hydrogen bonded interactions of **R:3H<sub>2</sub>O**.

| D-H...A             | D-H [Å]   | H...A [Å] | D...A [Å]  | D-H...A [°] |
|---------------------|-----------|-----------|------------|-------------|
| O1-H1...O5          | 1.02(3)   | 1.54(3)   | 2.5483(19) | 170(3)      |
| N3-H3...O2          | 0.91(2)   | 2.05(2)   | 2.952(2)   | 173.1(15)   |
| O5-H21...O3         | 0.831(12) | 2.066(14) | 2.8608(17) | 160(2)      |
| O5-H22...O4         | 0.835(16) | 1.881(16) | 2.7077(18) | 170.5(19)   |
| C13-H7...O4         |           |           |            |             |
| (intra) C13-H8...N4 | 0.98      | 2.58      | 3.461(2)   | 150         |
| C17-H18...O3        | 0.98      | 2.26      | 2.723(2)   | 108         |
| C15-H23...O1        | 0.98      | 2.52      | 3.386(2)   | 147         |
| C6-H11...O4         | 0.949(18) | 2.406(18) | 3.352(2)   | 175.4(13)   |

Table S3: Geometries of hydrogen bonded interactions of **R:AcOH:H<sub>2</sub>O**.

| <b>D-H...A</b>       | <b>D-H [Å]</b> | <b>H...A [Å]</b> | <b>D...A [Å]</b> | <b>D-H...A [°]</b> |
|----------------------|----------------|------------------|------------------|--------------------|
| <b>N2-H2...O6</b>    | 0.95(8)        | 1.91(7)          | 2.828(6)         | 163(6)             |
| <b>O3-H3...O1</b>    | 0.89(12)       | 1.78(12)         | 2.577(5)         | 148(9)             |
| <b>N7-H7...O2</b>    | 0.92(7)        | 1.86(8)          | 2.768(6)         | 175(7)             |
| <b>O7-H7A...O5</b>   | 0.82           | 1.8              | 2.598(6)         | 165                |
| <b>C11-H11A...N3</b> | 0.96           | 2.25             | 2.719(7)         | 109                |
| <b>C26-H26C...N8</b> | 0.96           | 2.32             | 2.694(7)         | 102                |

Table S4: Geometries of hydrogen bonded interactions of **R:HCOOH**.

## Lattice Energy and AIM calculations

The lattice Energy  $E_{lat}$  was calculated following the equation (1)

$$E_{lat} = \frac{E_{iss}}{Z} - \frac{\sum E_{isg,n}}{Z'} \quad (1)$$

where  $E_{lat}$  represents the lattice energy,  $E_{iss}$  the ideal static solid energy,  $E_{isg}$  the ideal static gas energy for each molecule, as well as  $Z$  and  $Z'$  the respective crystallographic parameters.

The binding energy (BE) in kcal/mol for neutral HBs based on the electron density at the BCPs can be estimated via following equation (2) provided by Emamian et al. [33]

$$BE \approx -223.08 \times \rho(r_{BCP}) + 0.7423 \quad (2)$$

With the electron density  $\rho$  in a.u. provided by the MultiWFN program package [22].

# Crystal Explorer molecular interaction energies

| Structure                    | Crystal Explorer model interaction energies calculations |                         |                  |                  |                  |                  |                  |
|------------------------------|----------------------------------------------------------|-------------------------|------------------|------------------|------------------|------------------|------------------|
|                              | N                                                        | Sym.op.                 | E <sub>ele</sub> | E <sub>pol</sub> | E <sub>dis</sub> | E <sub>rep</sub> | E <sub>tot</sub> |
| <b>R</b>                     | 2                                                        | x+1/2,<br>-y+1/2, z+1/2 | -23.7            | -12.9            | -21.9            | 25.8             | -37.7            |
|                              | 1                                                        | -x, -y, -z              | -45.6            | -10.1            | -116.9           | 71.5             | -113.4           |
|                              | 1                                                        | -x, -y, -z              | -56.1            | -11.8            | -122.3           | 76.8             | -127.1           |
|                              | 1                                                        | -x, -y, -z              | -70.8            | -20.8            | -14              | 95.5             | -43.4            |
| <b>R:AcOH</b>                | 1                                                        | x, y, z                 | -103.6           | -24.4            | -13.4            | 125.1            | -62.0            |
|                              | 1                                                        | -x, -y, -z              | -44.9            | -11.7            | -108.7           | 66.0             | -110.0           |
|                              | 1                                                        | -x, -y, -z              | -30.1            | -7.6             | -56.8            | 35.6             | -64.9            |
|                              | 1                                                        | -x, -y, -z              | -34.8            | -11.8            | -59.9            | 44.1             | -70.5            |
|                              | 2                                                        | 2-x, 1-y, 1-z           | -21.6            | -12.0            | -21.9            | 26.0             | -34.7            |
| <b>R:AcOH:H<sub>2</sub>O</b> | 1                                                        | x, y, z                 | -41.0            | -8.9             | -8               | 35.6             | -34.8            |
|                              | 1                                                        | 1-x, 1-y, 2-z           | -26.9            | -5.4             | -6.1             | 24.9             | -22.4            |
|                              | 1                                                        | 1-x, 0.5+y, 1.5-z       | -48.8            | -9.9             | -5.4             | 57.2             | -28.3            |
|                              | 1                                                        | -x, -y, -z              | -27.6            | -8.6             | -66.4            | 37.1             | -70.5            |
|                              | 1                                                        | -x, -y, -z              | -53.4            | -11.1            | -113.6           | 76.6             | -116.3           |
|                              | 2                                                        | x,<br>-y+1/2,<br>z+1/2  | -20.0            | -10.3            | -14.0            | 16.1             | -30.9            |
| <b>R:3H<sub>2</sub>O</b>     | 1                                                        | -x, -y, -z              | -44.8            | -9.2             | -98.8            | 57.8             | -104.6           |
|                              | 1                                                        | -x, -y, -z              | -47.5            | -9.8             | -105.3           | 62.3             | -110.7           |
|                              | 2                                                        | x, y, z                 | -18.3            | -9.7             | -16.4            | 13.2             | -32.6            |
|                              | 1                                                        | x, y, -1+z              | -45.2            | -10.3            | -5.5             | 44.9             | -32.4            |
|                              | 1                                                        | x, 1+y, -1+z            | -42.0            | -9.7             | -5.7             | 51.0             | -25.1            |
|                              | 1                                                        | 1-x, 1-y, -z            | -42.1            | -8.8             | -4.1             | 45.7             | -26.5            |
|                              | 1                                                        | 1-x, 1-y, -z            | -20.0            | -8.3             | -10.4            | 29.7             | -18.0            |
| <b>R:HCOOH</b>               | 1                                                        | x, y, z                 | -71.0            | -20.7            | -14.3            | 99.2             | -41.6            |
|                              | 2                                                        | x, y, z                 | 25.5             | -9.8             | -114.2           | 70.0             | -36.5            |
|                              | 2                                                        | -x,<br>y+1/2,<br>-z     | -25.8            | -10.3            | -15.7            | 24.9             | -33.2            |
|                              | 1                                                        | x, y, z                 | -75.3            | -19.1            | -12.5            | 74.6             | -58.5            |

Table S5: Crystal Explorer model interaction energies calculations, overview of strongest molecular interaction energy contributions in 3.8 Å cluster on central flavin unit with verbose parameters.

The scale factors used in Crystal Explorer molecular interaction energy calculations for CE-B3LYP (B3LYP/6-31G(d,p) electron densities are:  $k_{ele}=1.057$ ,  $k_{pol}=0.74$ ,  $k_{disp}=0.871$  and  $k_{rep}=0.618$ .
